# Supplementary material
Source: PubMed Central journal article supplement (PMC7453360)

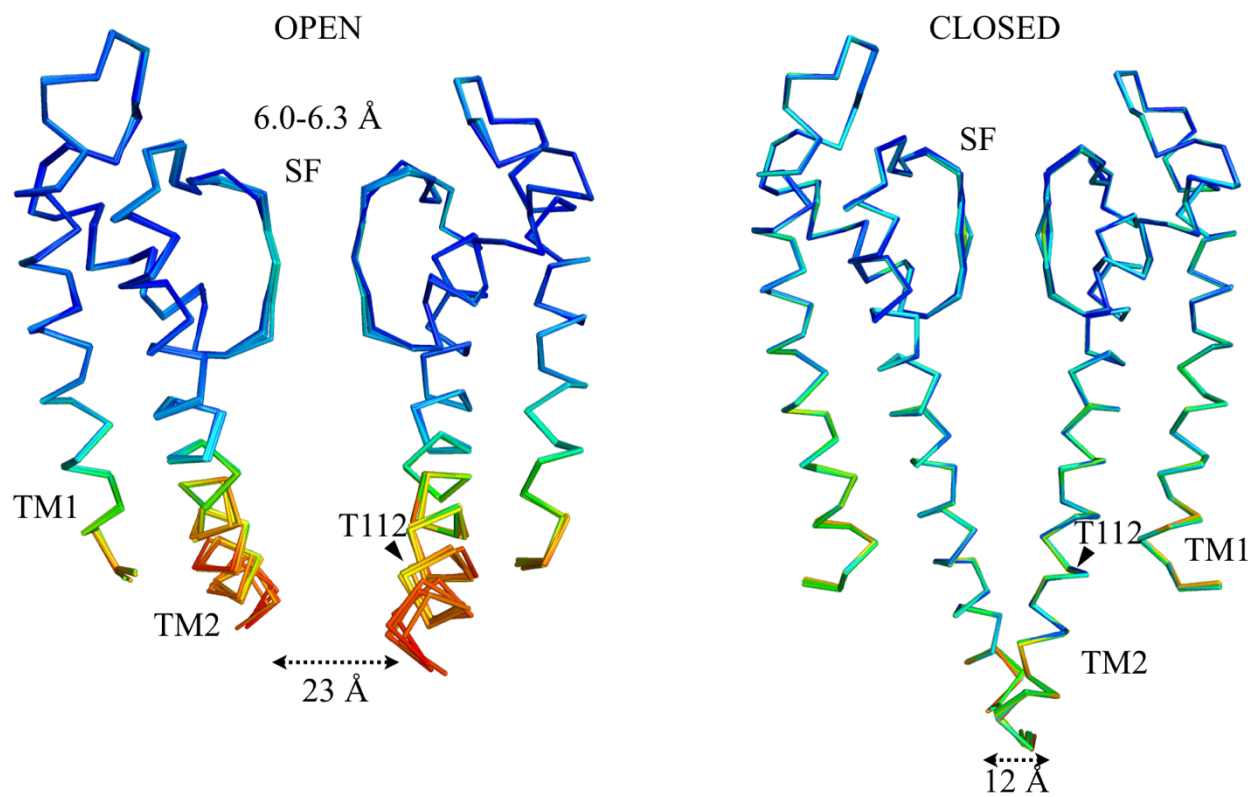

Figure S1.

Supplement: NIHMS1612436-supplement-mmc1.pdf [file NIHMS1612436-supplement-mmc1.pdf]
